# Supplementary material
Source: publisher figshare collection journal article supplement (https://acs.figshare.com/ndownloader/files/4737556)
Supplement: Supplementary file 1 [file 4737556]

data_publication_text
_publ_contact_author_name        'Jes\'us Vald\'es-Mart\'inez '
_publ_contact_author_address     
;Instituto de Qu\'imica, 
Universidad Nacional Aut\'onoma de M\'exico,  
Circuito Exterior, Ciudad Universitaria, 
04510, Coyoac\'an, Cd. M\'exico, D.F. 
M\'exico
;
_publ_contact_author_email       jvaldes@servidor.unam.mx
_publ_contact_author_phone       +52-55-56224514
_publ_contact_author_fax         +52-55-56162217
loop_
_publ_author_name
_publ_author_address
'Vald\'es-Mart\'inez, Jes\'us '
;Instituto de Qu\'imica, 
Universidad Nacional Aut\'onoma de M\'exico,  
Circuito Exterior, Ciudad Universitaria, 
04510, Coyoac\'an, Cd. M\'exico, D.F. 
M\'exico
;
'Baldovinos-Pantale\'on, Oscar '
;Instituto de Qu\'imica, 
Universidad Nacional Aut\'onoma de M\'exico,  
Circuito Exterior, Ciudad Universitaria, 
04510, Coyoac\'an, Cd. M\'exico, D.F. 
M\'exico
;
'Morales-Morales, David '
;Instituto de Qu\'imica, 
Universidad Nacional Aut\'onoma de M\'exico,  
Circuito Exterior, Ciudad Universitaria, 
04510, Coyoac\'an, Cd. M\'exico, D.F. 
M\'exico
;
'Hern\'andez-Ortega, Sim\'on '
;Instituto de Qu\'imica, 
Universidad Nacional Aut\'onoma de M\'exico,  
Circuito Exterior, Ciudad Universitaria, 
04510, Coyoac\'an, Cd. M\'exico, D.F. 
M\'exico
;
'Toscano, Rub\'en A. '
;Instituto de Qu\'imica, 
Universidad Nacional Aut\'onoma de M\'exico,  
Circuito Exterior, Ciudad Universitaria, 
04510, Coyoac\'an, Cd. M\'exico, D.F. 
M\'exico
;


  
data_266mmd04 
  
_audit_creation_method            SHELXL-97 
_chemical_name_systematic 
; 
 ? 
; 
_chemical_name_common             ? 
_chemical_melting_point           ? 
_chemical_formula_moiety          ? 
_chemical_formula_sum 
 'C6 H5 Cl F2 N Pd0.50' 
_chemical_formula_weight          217.76 
  
loop_ 
 _atom_type_symbol 
 _atom_type_description 
 _atom_type_scat_dispersion_real 
 _atom_type_scat_dispersion_imag 
 _atom_type_scat_source 
 'C'  'C'   0.0033   0.0016 
 'International Tables Vol C Tables 4.2.6.8 and 6.1.1.4' 
 'H'  'H'   0.0000   0.0000 
 'International Tables Vol C Tables 4.2.6.8 and 6.1.1.4' 
 'N'  'N'   0.0061   0.0033 
 'International Tables Vol C Tables 4.2.6.8 and 6.1.1.4' 
 'F'  'F'   0.0171   0.0103 
 'International Tables Vol C Tables 4.2.6.8 and 6.1.1.4' 
 'Cl'  'Cl'   0.1484   0.1585 
 'International Tables Vol C Tables 4.2.6.8 and 6.1.1.4' 
 'Pd'  'Pd'  -0.9988   1.0072 
 'International Tables Vol C Tables 4.2.6.8 and 6.1.1.4' 
  
_symmetry_cell_setting            Monoclinic 
_symmetry_space_group_name_H-M    'P 2 1/c '
  
loop_ 
 _symmetry_equiv_pos_as_xyz 
 'x, y, z' 
 '-x, y+1/2, -z+1/2' 
 '-x, -y, -z' 
 'x, -y-1/2, z-1/2' 
  
_cell_length_a                    4.6825(3) 
_cell_length_b                    5.9943(4) 
_cell_length_c                    25.622(2) 
_cell_angle_alpha                 90.00 
_cell_angle_beta                  90.414(1) 
_cell_angle_gamma                 90.00 
_cell_volume                      719.15(8) 
_cell_formula_units_Z             4 
_cell_measurement_temperature     291(2) 
_cell_measurement_reflns_used     4858 
_cell_measurement_theta_min       2.38 
_cell_measurement_theta_max       33.07 
  
_exptl_crystal_description        Prism-Laminar 
_exptl_crystal_colour             Orange 
_exptl_crystal_size_max           0.23 
_exptl_crystal_size_mid           0.12 
_exptl_crystal_size_min           0.05 
_exptl_crystal_density_meas       .
_exptl_crystal_density_diffrn     2.011 
_exptl_crystal_density_method     'not measured' 
_exptl_crystal_F_000              424 
_exptl_absorpt_coefficient_mu     1.698 
_exptl_absorpt_correction_type    integration 
_exptl_absorpt_correction_T_min   0.7226 
_exptl_absorpt_correction_T_max   0.9206 
_exptl_absorpt_process_details    ? 
  
_exptl_special_details 
; 
 ? 
; 
  
_diffrn_ambient_temperature       291(2) 
_diffrn_radiation_wavelength      0.71073 
_diffrn_radiation_type            MoK\a 
_diffrn_radiation_source          'fine-focus sealed tube' 
_diffrn_radiation_monochromator   graphite 
_diffrn_measurement_device_type   'Bruker Smart APEX AXS CCD area detector' 
_diffrn_measurement_method        'omega scans' 
_diffrn_detector_area_resol_mean  ? 
_diffrn_standards_number          ? 
_diffrn_standards_interval_count  ? 
_diffrn_standards_interval_time   ? 
_diffrn_standards_decay_%         ? 
_diffrn_reflns_number             5591 
_diffrn_reflns_av_R_equivalents   0.0328 
_diffrn_reflns_av_sigmaI/netI     0.0252 
_diffrn_reflns_limit_h_min        -5 
_diffrn_reflns_limit_h_max        5 
_diffrn_reflns_limit_k_min        -7 
_diffrn_reflns_limit_k_max        7 
_diffrn_reflns_limit_l_min        -30 
_diffrn_reflns_limit_l_max        30 
_diffrn_reflns_theta_min          3.18 
_diffrn_reflns_theta_max          25.00 
_reflns_number_total              1263 
_reflns_number_gt                 1126 
_reflns_threshold_expression      >2sigma(I) 
  
_computing_data_collection        'SMART V 5.625' 
_computing_cell_refinement        'SMART V 5.625' 
_computing_data_reduction         'SAINT V 6.23C' 
_computing_structure_solution     'SHELXS-97 (Sheldrick, 1990)' 
_computing_structure_refinement   'SHELXL-97 (Sheldrick, 1997)' 
_computing_molecular_graphics     'SHELXTL V 6.10' 
_computing_publication_material   'SHELXTL V 6.10' 
#_solved_by SimonHO 
  
_refine_special_details 
; 
 Refinement of F^2^ against ALL reflections.  The weighted R-factor wR and 
 goodness of fit S are based on F^2^, conventional R-factors R are based 
 on F, with F set to zero for negative F^2^. The threshold expression of 
 F^2^ > 2sigma(F^2^) is used only for calculating R-factors(gt) etc. and is 
 not relevant to the choice of reflections for refinement.  R-factors based 
 on F^2^ are statistically about twice as large as those based on F, and R- 
 factors based on ALL data will be even larger. 
; 
  
_refine_ls_structure_factor_coef  Fsqd 
_refine_ls_matrix_type            full 
_refine_ls_weighting_scheme       calc 
_refine_ls_weighting_details 
 'calc w=1/[\s^2^(Fo^2^)+(0.0224P)^2^] where P=(Fo^2^+2Fc^2^)/3' 
_atom_sites_solution_primary      direct 
_atom_sites_solution_secondary    difmap 
_atom_sites_solution_hydrogens    geom 
_refine_ls_hydrogen_treatment     mixed 
_refine_ls_extinction_method      none 
_refine_ls_extinction_coef        ? 
_refine_ls_number_reflns          1263 
_refine_ls_number_parameters      103 
_refine_ls_number_restraints      0 
_refine_ls_R_factor_all           0.0222 
_refine_ls_R_factor_gt            0.0189 
_refine_ls_wR_factor_ref          0.0439 
_refine_ls_wR_factor_gt           0.0430 
_refine_ls_goodness_of_fit_ref    1.002 
_refine_ls_restrained_S_all       1.002 
_refine_ls_shift/su_max           0.000 
_refine_ls_shift/su_mean          0.000 
  
loop_ 
 _atom_site_label 
 _atom_site_type_symbol 
 _atom_site_fract_x 
 _atom_site_fract_y 
 _atom_site_fract_z 
 _atom_site_U_iso_or_equiv 
 _atom_site_adp_type 
 _atom_site_occupancy 
 _atom_site_symmetry_multiplicity 
 _atom_site_calc_flag 
 _atom_site_refinement_flags 
 _atom_site_disorder_assembly 
 _atom_site_disorder_group 
Pd1 Pd 0.5000 0.0000 0.5000 0.02939(10) Uani 1 2 d S . . 
Cl1 Cl 0.81098(12) -0.27095(9) 0.47255(2) 0.04085(16) Uani 1 1 d . . . 
F1 F 0.3796(4) -0.1216(4) 0.28075(7) 0.0872(6) Uani 1 1 d . . . 
F2 F -0.0387(4) 0.5492(3) 0.33178(7) 0.0777(6) Uani 1 1 d . . . 
N1 N 0.6543(4) 0.2054(3) 0.44288(8) 0.0364(5) Uani 1 1 d . . . 
H1A H 0.681(5) 0.320(4) 0.4567(10) 0.044 Uiso 1 1 d . . . 
H1B H 0.813(5) 0.149(4) 0.4383(9) 0.044 Uiso 1 1 d . . . 
C1 C 0.4860(5) 0.2089(4) 0.39570(8) 0.0341(5) Uani 1 1 d . . . 
C2 C 0.5130(6) 0.0357(4) 0.36067(10) 0.0433(6) Uani 1 1 d . . . 
H2 H 0.6354 -0.0834 0.3671 0.052 Uiso 1 1 calc R . . 
C3 C 0.3511(6) 0.0468(5) 0.31566(11) 0.0534(8) Uani 1 1 d . . . 
C4 C 0.1642(6) 0.2149(5) 0.30475(10) 0.0554(8) Uani 1 1 d . . . 
H4 H 0.0559 0.2167 0.2742 0.066 Uiso 1 1 calc R . . 
C5 C 0.1445(6) 0.3801(5) 0.34102(11) 0.0507(7) Uani 1 1 d . . . 
C6 C 0.3012(5) 0.3842(4) 0.38671(9) 0.0416(6) Uani 1 1 d . . . 
H6 H 0.2832 0.5003 0.4105 0.050 Uiso 1 1 calc R . . 
  
loop_ 
 _atom_site_aniso_label 
 _atom_site_aniso_U_11 
 _atom_site_aniso_U_22 
 _atom_site_aniso_U_33 
 _atom_site_aniso_U_23 
 _atom_site_aniso_U_13 
 _atom_site_aniso_U_12 
Pd1 0.03292(15) 0.02322(14) 0.03191(15) -0.00115(10) -0.00812(10) 0.00124(10) 
Cl1 0.0410(3) 0.0296(3) 0.0519(4) -0.0049(3) -0.0053(3) 0.0062(3) 
F1 0.1084(15) 0.0995(15) 0.0534(11) -0.0340(11) -0.0096(10) 0.0012(13) 
F2 0.0698(12) 0.0906(14) 0.0726(12) 0.0233(10) -0.0149(10) 0.0295(10) 
N1 0.0397(12) 0.0302(12) 0.0392(12) 0.0002(9) -0.0056(10) -0.0010(10) 
C1 0.0340(12) 0.0382(13) 0.0301(12) 0.0052(10) -0.0004(10) -0.0043(11) 
C2 0.0447(15) 0.0442(16) 0.0411(15) -0.0037(11) -0.0018(12) 0.0020(12) 
C3 0.0594(18) 0.064(2) 0.0367(15) -0.0103(13) 0.0015(13) -0.0087(15) 
C4 0.0515(16) 0.081(2) 0.0334(15) 0.0088(14) -0.0102(12) -0.0070(16) 
C5 0.0423(15) 0.0619(18) 0.0477(17) 0.0188(15) -0.0021(13) 0.0054(15) 
C6 0.0451(15) 0.0414(15) 0.0383(14) 0.0038(12) 0.0010(11) 0.0034(13) 
  
_geom_special_details 
; 
 All esds (except the esd in the dihedral angle between two l.s. planes) 
 are estimated using the full covariance matrix.  The cell esds are taken 
 into account individually in the estimation of esds in distances, angles 
 and torsion angles; correlations between esds in cell parameters are only 
 used when they are defined by crystal symmetry.  An approximate (isotropic) 
 treatment of cell esds is used for estimating esds involving l.s. planes. 
; 
  
loop_ 
 _geom_bond_atom_site_label_1 
 _geom_bond_atom_site_label_2 
 _geom_bond_distance 
 _geom_bond_site_symmetry_2 
 _geom_bond_publ_flag 
Pd1 N1 2.048(2) 3_656 ? 
Pd1 N1 2.048(2) . ? 
Pd1 Cl1 2.2952(6) 3_656 ? 
Pd1 Cl1 2.2952(6) . ? 
F1 C3 1.356(3) . ? 
F2 C5 1.348(3) . ? 
N1 C1 1.438(3) . ? 
C1 C2 1.379(3) . ? 
C1 C6 1.379(3) . ? 
C2 C3 1.377(4) . ? 
C3 C4 1.362(4) . ? 
C4 C5 1.362(4) . ? 
C5 C6 1.378(3) . ? 
  
loop_ 
 _geom_angle_atom_site_label_1 
 _geom_angle_atom_site_label_2 
 _geom_angle_atom_site_label_3 
 _geom_angle 
 _geom_angle_site_symmetry_1 
 _geom_angle_site_symmetry_3 
 _geom_angle_publ_flag 
N1 Pd1 N1 180.0 3_656 . ? 
N1 Pd1 Cl1 88.77(6) 3_656 3_656 ? 
N1 Pd1 Cl1 91.23(6) . 3_656 ? 
N1 Pd1 Cl1 91.23(6) 3_656 . ? 
N1 Pd1 Cl1 88.77(6) . . ? 
Cl1 Pd1 Cl1 180.00(3) 3_656 . ? 
C1 N1 Pd1 114.53(14) . . ? 
C2 C1 C6 121.7(2) . . ? 
C2 C1 N1 118.9(2) . . ? 
C6 C1 N1 119.4(2) . . ? 
C3 C2 C1 117.2(2) . . ? 
F1 C3 C4 118.8(3) . . ? 
F1 C3 C2 117.4(3) . . ? 
C4 C3 C2 123.8(3) . . ? 
C5 C4 C3 116.4(3) . . ? 
F2 C5 C4 118.3(3) . . ? 
F2 C5 C6 118.1(3) . . ? 
C4 C5 C6 123.7(3) . . ? 
C5 C6 C1 117.3(2) . . ? 
  
loop_ 
 _geom_hbond_atom_site_label_D 
 _geom_hbond_atom_site_label_H 
 _geom_hbond_atom_site_label_A 
 _geom_hbond_distance_DH 
 _geom_hbond_distance_HA 
 _geom_hbond_distance_DA 
 _geom_hbond_angle_DHA 
 _geom_hbond_site_symmetry_A 
N1 H1A Cl1  0.78(2) 2.56(3) 3.311(2) 162(2) 1_565 
  
_diffrn_measured_fraction_theta_max    0.999 
_diffrn_reflns_theta_full              25.00 
_diffrn_measured_fraction_theta_full   0.999 
_refine_diff_density_max    0.263 
_refine_diff_density_min   -0.245 
_refine_diff_density_rms    0.055 
